1     **Correlation between meteorological factors and COVID-19 infection in**  
2                                    **the Belém Metropolitan Region**

3  
4  
5     Félix Lélis da Silva<sup>a\*</sup>, Maryjane Diniz A. Gomes<sup>b</sup>, Andréa P. Lélis da Silva<sup>c</sup>, Samio  
6     Costa de Sousa<sup>d</sup>, Marcos Francisco Serafim de Souza<sup>e</sup>, Gabriel Lélis P. da Silva<sup>f</sup>

7  
8     <sup>a, b, e</sup> Federal Institute of Science and Technology Education of Pará - IFPA Campus  
9     Castanhal

10    <sup>a, b</sup> Research Group on Experimentation and Biosystem Modeling Management –  
11    GEMAbio

12    <sup>c</sup> Metropolitan Regional Hospital - Specialist in Intensive Care Unit and

13    <sup>e</sup> Language, Culture, Technology and Inclusion Research Group - Licti / IFPA

14    <sup>f</sup> Estácio de Sá College of Castanhal, Law undergraduate student.

15

16    **Corresponding author (s):** \* Félix Lélis da Silva ([felix.jelis@ifpa.edu.br](mailto:felix.jelis@ifpa.edu.br)),

17

18

19    **Abstract**

20

21    Many factors can influence the spread of viruses and respiratory infections. Studies  
22    have suggested that there is a direct relationship between environmental issues and  
23    population density with cases of COVID-19. In this sense, this research aims to analyze,  
24    through correlational study and Krigagem, the relationship of meteorological and  
25    demographic variables with cases of COVID-19 in regions of subtropical climate in  
26    Brazil. The results suggest that population and demographic density (hab/km<sup>2</sup>) are risk  
27    factors for the spread of SAR-Cov-2 and an increase in the daily case record of COVID-  
28    19. The distribution of cases according to age group did not present a significant  
29    disparity between men and women. Relative humidity (RH)%, average temperature °C,

30 minimum temperature °C, maximum temperature °C, wind speed m/s and daily  
31 precipitation (rain) mm show negative relationships with cases of COVID-19 in regions  
32 of humid equatorial climate. Analysis between associations of environmental factors,  
33 wind, temperature and HR in a region is extremely important to understand the  
34 dynamics of SARS-Cov-2 in the environment. In the northern region of Brazil, low  
35 wind speed, high temperatures and high RH are observed, environmental factors that,  
36 when associated, reduce the transmission process because it hinders the movement of  
37 the virus in the environment. In this sense, it is suggested that the transmission of  
38 SARS-CoV-2 in this region is disseminated through fluids in the air between man/man  
39 and by contact between objects/men. Therefore, strategic public policies to combat the  
40 pandemic must consider the environmental factors of the regions involved and control  
41 and/or blocking the transit of people.

42 **Keywords:** Environmental factors, Demography, Epidemiology, Coronavirus.

43

## 44 **1. Introduction**

45

46 The outbreak of the disease caused by the new coronavirus (COVID-19) institutes  
47 a worldwide public health emergency and, due to its high spread, internationally, a  
48 pandemic has been officially declared by the World Health Organization (WHO, 2020).  
49 COVID-19 is a viral infection that causes a severe acute respiratory syndrome and can  
50 cause progressive respiratory failure and death (Coccia, 2020).

51 Wuhan, China, was considered the first metropolitan region to be the center of the  
52 epidemic in December 2019 (Zhou et al., 2020; Wang et al., 2020). In the region,  
53 studies infer that several environmental factors contributed to the spread of the infection  
54 (Bhattachaejee, 2020; Liu et al., 2020; Ma et al., 2020).

55           The transmission factors of a viral disease can be as variable as possible. The  
56 spread of a virus is associated with environmental factors (temperature, wind speed and  
57 relative humidity), population density and organization, efficiency of the health sector,  
58 and general factors, such as the biological characteristics of the virus, time of  
59 incubation, effects on infected and susceptible people (Wang et al., 2020).

60           Meteorological factors play an important role in the spread of SARS Cov-2. In  
61 China, a country with climatic diversity, low temperature and relative humidity ranges  
62 favored the transmission of the virus (Liu et al., 2020). The transmission rate of  
63 COVID-19 has low sensitivity to changes in ambient temperature and high sensitivity to  
64 population size (Jahangiri, Jahangiri, Najafgholipour, 2020).

65           Studies have suggested that temperature is a conductor of COVID-19 (Shi et al.,  
66 (2020a), and acts as an indicator of transmission of SARS-COV-2. According to Tan et  
67 al. (2005), the incidence of COVID- 19 presents different dynamics in temperature  
68 variations in the region, so to analyze the spread of the SARS-COV-2 virus associated  
69 with environmental factors, one must consider the climatic and demographic  
70 characteristics of the region where the infection occurred.

71           Although 90% of COVID-19 cases have been reported in countries with a  
72 temperature range of 3 to 17 ° C (Bukhari and Jameel, 2020), SARS-CoV-2 can survive  
73 for several days in plastics and metals at temperatures moderate (between 21 and 23 °  
74 C) and an RH of 40% (Van Doremalen et al., 2020). This suggests that there may be a  
75 direct relationship between temperature, humidity, air pollutants, the environment and  
76 the spread of SARS-CoV-2.

77           Lal et al (2020) state that there is no evidence to support that cases of COVID-19  
78 reduce in hot climates. However, studies suggest that temperature in tropical regions has

79 an influence on case reports of influenza (Tamerius et al., 2013). Likewise,  
80 environmental factors have an influence on the dynamics of the spatial distribution of  
81 infectious diseases (Lemaitre et al., 2019). These results are useful, as they provide  
82 implications for public policy makers in regions with different climatic conditions.

83 It is necessary to conduct studies in other regions, during the pandemic, to assess  
84 the implication of these environmental factors in the transmission of COVID-19.  
85 Researchers estimate that climatic variables explain 18% of the variation in the time of  
86 disease transmission and 82% are related to containment measures, health policies,  
87 population density, transport or cultural aspects (Oliveiros et al., 2020).

88 In the Americas, the number of infected people has evolved rapidly, with more  
89 than 1.5 million cases and 50 thousand deaths in the period of this study (PAHO, 2020).  
90 In the Americas region, Brazil stands out as the second country in number of incidence  
91 and mortality (WHO, 2020).

92 According to Hotez et al. (2020), regions such as Brazil, Mexico, Pakistan,  
93 Philippines and South Africa are vulnerable to the spread of SARS-CoV-2. The  
94 researchers suggest the possibility of an unprecedented advance in infections and  
95 mortality in poorer regions in tropical and subtropical countries.

96 Brazil has a great climatic variety and presents regions with high demographic  
97 densities associated with low levels of human development. In Latin America, Brazil  
98 has shown an increase in the registration of cases and deaths due to COVID-19, to the  
99 point of being classified as a new epidemic center for SARS-CoV-2 by the World  
100 Health Organization.

101 1 - Do the cases of COVID-19 present a gender/gender gap in the BMR?

102 2 - Are meteorological variables risk factors for the advance of the pandemic in  
103 the region of the Pará State, Northern Brazil?

104 3 - Which environmental factors are correlated to 5% significance with cases of  
105 COVID-19 in the region?

106 4 - Can high temperatures and RH in the region favor the reduction of the  
107 SARS-Cov-2 outbreak and the registration of new cases of COVID-19?

108 5 - Can the beginning of the less rainy period in the Amazon region contribute to  
109 the reduction of COVID-19 cases?

110 6 - What are the considerations for regions with similar climatic behavior?

111

## 112 **2. Materials e methods**

113

114 An epidemiological and correlation analysis was performed on the demographic  
115 characteristics of the diagnosed infected. The variables evaluated were: sex/gender, age  
116 group, population and demographic density. Subsequently, the correlation between  
117 environmental variables such as, average temperature °C, minimum temperature °C,  
118 maximum temperature °C, Relative Humidity % (RH), precipitation (mm) and wind  
119 speed (m/s) (INMET, 2020) and the registration of new daily cases of COVID-19  
120 (BRASIL, 2020).

### 121 2.1. Study area

122 The present epidemiological study was carried out in diagnosed cases of COVID-19 in  
123 the seven municipalities that make up the Belém Metropolitan Region (BMR), Pará  
124 (Fig.1).

125

126 **Fig.1.** Composition of the Belém Metropolitan Region - BMR

127

128 BMR has a humid equatorial climate, a high population record, with about  
129 2,275,032 inhabitants and varied demographic density. Its municipal regions have a  
130 subtropical climate with wide variations in temperature and high rainfall, distributed  
131 over two seasons (more and less rainy). The months between June and December are  
132 considered the rainiest months in the Amazon (SOUZA FILHO et al., 2005; MORAES  
133 et al., 2005).

134 BMR is composed of 7 municipalities, they are: Belém, Ananindeua, Marituba,  
135 Benevides, Castanhal, Santa Barbara do Pará and Santa Izabel do Pará (IBGE, 2020).  
136 During the study period the Relative Humidity (%) in the regions is distributed between  
137 80 to 100% with an average of 90.3%. The temperature range was 24.7 to 34.8 °C, daily  
138 rainfall was 0 to 97.8 mm and the recorded wind speed was between 0 to 3,601 m/s  
139 (INMET, 2020).

140

141 2.2. Data collect

142

143 The collection period ranged from March 18, 2020 to May 6, 2020, a period that  
144 preceded the implementation of the “Lockdown Regime”. Data on COVID-19 cases  
145 registered in the Belém Metropolitan Region (BMR) were obtained from the website of  
146 the Ministry of Health of Brazil (Brazil, 2020) and Health Department of the Pará State  
147 (SESPA, 2020). Meteorological data were obtained from stations located in the regions  
148 of Belém, Cametá, Breves, Castanhal, Tracuateua and Tucuruí (INMET, 2020).

149 Figure. 2 shows the epidemiological situation (on May 5, 2020) in the  
150 Metropolitan Region of Belém (RMB). Although the first COVID-19 case was  
151 announced in the world in late December 2019 (Şahin, 2020; Zhou et al., 2020), the first

152 case in Brazil was reported on February 26, 2020. In the city of Belém, state of Pará,  
153 northern Brazil the first case, a 37-year-old man, was notified on March 18, 2020,  
154 exactly 23 days after the first case registered in the country (SESPA, 2020).

155

156 **Fig.2.** Case records of COVID-19 accumulated in the municipalities of BMR

157

158 2.3. Statistical analysis

159

160 The descriptive analyzes of the variables were expressed as mean and number  
161 (%). Cases without identification for age and gender were imputed. The proportions and  
162 mean between gender were analyzed using the Chi-square test of adherence and the  
163 Independence T test considering homogeneity of variance of the data with a significance  
164 alpha level 5%.

165 The distribution of cases within genders was assessed using boxplot diagrams.  
166 The occurrences of cases and the mean age of the infected were analyzed using the Chi-  
167 square test and the Independence T test. The correlations between number of cases and  
168 environmental variables were analyzed using the Spearman test.

169 Spearman's nonparametric test was applied due to the monotonic relationship  
170 between ordinal variables and non-compliance with the assumption of normality. It was  
171 used to assess the association between the number of COVID-19 cases and  
172 environmental factors. Spearman's coefficient (Eq.1) was calculated according to  
173 (Sahin, 2020).

$$\rho_s = 1 - \frac{6 \cdot \sum d_i^2}{n(n^2 - 1)} \text{ Eq. 1}$$

174 Where:  $\rho_S$  is the Spearman coefficient,  $n$  the number of alternatives and  $d_i$  represents  
175 the difference between the rows of the corresponding variables.

176 For the interpretation of the results, the magnitude of the correlations followed  
177 the following classification: correlation coefficient  $\rho < 0.4$  implies a weak correlation,  
178 between  $0.4 \leq \rho < 0.5$  moderate correlation and  $\rho \geq 0.5$  a strong correlation between  
179 the variables evaluated (Hulley et al., 2003). The maps of temperature, relative  
180 humidity, precipitation and number of cases were structured using Krigagem spatial  
181 interpolation algorithm.

182

### 183 **3. Results and discussions**

184

185 In this section are presented: descriptive epidemiological and demographic  
186 analysis, proportional analysis (Chi-square test) for the occurrence of cases between  
187 sex/gender and parametric analysis (t test) to assess the age factor within the sex/gender  
188 of those infected. Next, a simple and multiple correlational analysis between  
189 meteorological variables and COVID-19 cases is demonstrated.

190

#### 191 **3.1 Epidemiological and demographic analyzes**

192

193 In the period from March 18, 2020 to May 6, 2020, about 3969 cases were  
194 reported in the BMR by the State Health Department of Pará. Of these, 1986 (51.04%)  
195 were women and 1905 (48.96%) men. The average age of men was  $48.11 \pm 17.94$  years  
196 with relative variability of  $CV = 37.29\%$  and of women  $46.51 \pm 17.45$  years and  $CV$  of  
197  $37.53\%$ . Of these, 16 cases presented with no notification regarding sex/gender and 62  
198 due to lack of identification regarding the age of the infected person.



199 As for the occurrence of cases by gender/sex in the municipalities of BMR,  
200 women were the most affected in Ananindeua (54.9%), Belém (51.2%) and Santa Izabel  
201 (51.5%) of the cases registered in the study period. Opposite results were obtained by  
202 Nikpouraghdam et al. (2020) for (sex/gender), with most infections registered in 66% of  
203 men and 44% in women. However, the cases recorded in men were proportionally  
204 higher in the municipalities of Marituba (67.4%), Benevides (63.6%), Castanhal  
205 (60.9%) and Santa Barbará (55.6%).

206 Table 1 lists the number of cases of COVID-19 in the municipal regions that  
207 occurred in the period. Epidemiological results indicate that most records occurred in  
208 the state capital Belém with 3223 (76.87%) cases, followed by Ananindeua (591;  
209 14.09%), Castanhal (176; 4.20%), Santa Izabel (103; 2.46%), Marituba (47; 1.12%),  
210 Benevides (44; 1.05%) and Santa Barbara (9; 0.21%).

211 The capital Belém has the largest population (1,393,399 inhabitants) and a  
212 population density of 1,313, .26 inhabitants per square kilometer. The region was the  
213 dissemination center for the SARS-CoV-2 virus, through community transmission, to  
214 neighboring municipalities that comprise the BMR, as well as to other regions of the  
215 state.

216  
217 **Table 1.** Relational behavior of demographics and new cases of COVID-19 recorded in  
218 Belém Metropolitan Region.

219  
220 The city of Belém had the highest number of infected people among the seven  
221 municipalities that make up the BMR with 2996 cases (65.9%), followed by  
222 Ananindeua (517; 14.1%) and Castanhal (156; 4.2%) of the records in the period. It is  
223 worth mentioning that these municipalities are located on the margins of the BR

224 Highway 316, which connects Capital Belém to other cities in the country and to several  
225 other municipalities of Pará State.

226

227 3.2 Non-parametric and parametric analyzes

228

229 In Table 1, the Spearman test ( $\rho = 0.987$ ) was applied to assess the  
230 relationship between population and density in the occurrence of cases of COVID-19.  
231 The results show that there is a high positive correlation between the number of  
232 registered cases and the total population of these regions. However, demographic  
233 density and cases of infection by COVID-19 with ( $\rho = 0.393$ ) show a moderate  
234 correlation. Similar results were obtained by Sahin (2020), considering that urban  
235 centers with large agglomerations are closely linked to high infections by COVID-19.

236 The Chi-square test to assess the existence of a significant difference between  
237 cases occurring by gender in the municipalities in the region (Table 1) demonstrated a  
238 significant proportional difference of 5% between those infected by gender (male and  
239 female) in Ananindeua, Castanhal and Marituba. In the other regions, no proportional  
240 difference was observed, results reinforced by Figure 3A. These results show that  
241 sex/gender does not depend on the number of registered cases of SARS-CoV-2  
242 infections. Therefore, sex is not associated with a risk factor for COVID-19.

243 The Independence T tests, applied to compare the average ages of those affected  
244 by the virus by gender within the municipalities, were not significant at 5%. These tests  
245 demonstrate that there are no significant differences between the mean ages and that  
246 there is no difference in the behavior of the distribution of cases by age group between  
247 men and women.

248 This fact can be proven through the similarity of the variation coefficients  
249 (CV%) of the ages (Table 1) and Figures 3 B and C. These results show that within the  
250 municipal regions, which make up the BMR, the age group factor is not the COVID-19  
251 is a risk factor. However, the economically active population aged 20 to 60 years is the  
252 most affected by the disease.

253

254 **Fig.3.** A) Behavior of the distribution of the total cases of COVID-19 according to age  
255 group and B, C) distribution by gender of the infected diagnosed in the municipalities of  
256 BMR

257

258 3.3 Simple correlational analysis between meteorological factors and COVID-19

259

260 Meteorological variables and their parameters are among the main causes that  
261 affect the dynamics of the spread of infectious diseases and the spread of viruses.  
262 Analyzing Spearman's correlation coefficients with the respective levels of probability  
263 of the test (p-value), it is observed that environmental factors such as RH, average  
264 temperature, minimum temperature, maximum temperature, precipitation and wind,  
265 present a negative correlation with the numbers of COVID-19 cases in the  
266 municipalities that make up the metropolitan region of Belém (Table 2).

267

268 **Table. 2.** Spearman test to assess the correlations between environmental variables and  
269 COVID-19 case records, in the cities of BMR.

270

271 RH presented a negative, but not significant, correlation with the number of  
272 infection cases in the municipalities of Belém, Ananindeua and Santa Barbara.

273 However, the number of COVID-19 cases did not correlate with RH in the municipality  
274 of Benevides. The region of Santa Izabel and Castanhal showed a significant negative  
275 correlation at 1% ( $p = 0.005$ ) with the daily record of infections. Negative correlations  
276 for cases of COVID-19 and RH % were obtained by Sahin (2020) in Turkey,  
277 contributing to the present study.

278 This pointed out that the case/day records of infected people in these  
279 municipalities are significantly associated with RH. The records also demonstrate that  
280 an increase in RH implies a reduction in cases of COVID-19 in these locations.  
281 Likewise, studies carried out by Chan et al., (2020), suggest that high RH eliminates the  
282 viability of the SARS-CoV-2 virus, corroborating the results presented.

283 It is worth noting that the environmental factor RH%, in the region of the study  
284 in the evaluated period, is positively correlated to the rain factor and negatively  
285 correlated with average temperature and its maximum variation.

286 The minimum temperature recorded in the region has a negative correlation with  
287 the number of cases of COVID-19 recorded in the municipalities of Ananindeua,  
288 Benevides, Santa Barbara and Marituba. Temperature, despite the weak magnitude of  
289 correlation, stood out in the Santa Barbara region; that is, in this location, the minimum  
290 temperature in °C is associated with statistical significance to the number of daily  
291 infection case records.

292 Similar results, when assessing the spread of the number of cases of the SARS  
293 virus in the region of Beijing and Hong Kong to Bi et al., (2007) and in the region of  
294 Turkey according to (Sahin, 2020), concluded that the temperature is closely related ,  
295 because at high temperatures a reduction in case records was observed.

296           The average temperatures recorded in the municipalities of Ananindeua,  
297 Benevides and Santa Barbara show a negative correlation to the cases of COVID-19  
298 recorded in these regions. However, it has been proven through Spearman's test that  
299 there is no evidence to confirm the significance of such relationships.

300           Bashir et al., (2020), after studies of the patterns of climate change in New York  
301 on the expansion of COVID-19, suggest that the average and minimum temperatures in  
302 the region were correlated with the case record. Results consistent with those observed  
303 in this study for BMR were also observed by Shi et al. (2020b), in mainland China. For,  
304 the researchers identified negative correlations of temperatures and Relative Humidity  
305 in the cases of COVID-19.

306           The maximum temperature °C showed a negative correlation with the number of  
307 cases of SARS-CoV-2 infections in the municipalities of Belém, Ananindeua,  
308 Benevides and Santa Barbara. However, without statistical evidence to suggest that this  
309 correlation occurs significantly.

310           Results obtained by Prata, Rodrigues and Bermejo (2020), for Brazilian cities,  
311 indicated the same negative behavior for linear correlation between temperatures and  
312 numbers of confirmed cases. However, studies by Shi et al. (2020) identified a  
313 correlation between the increase in the number of COVID-19 cases at temperatures  
314 above 10°C.

315           According to Chatziprodromidou et al., (2020) high temperatures and high  
316 humidity reduce the transmission of COVID-19. Tosepu et al., (2020), suggest that the  
317 climate is an important factor in determining the incidence rate of COVID-19, and the  
318 temperature and its variations are correlated with the registration of infections.

319           Regarding the environmental factor rainfall, the results show that there is a  
320 negative correlation with the number of cases of infections in Belém municipalities,  
321 Santa Barbara and Castanhal. However, this association is not statistically significant.  
322 Equivalent results of correlation of precipitation with cases of covid-19 were identified  
323 by Menebo (2020).

324           Wind speed in the cities of Santa Barbara showed a negative correlation with  
325 daily records of cases of COVID-19. However, in the Castanhal region during the study  
326 period, wind speed was positively correlated with cases of COVID-19. This leads us to  
327 believe that the higher the wind speed in the region, the greater the spread of the SARS-  
328 CoV-2 virus. Although these results were not significant at 5%, using the Spearman rho  
329 test, it is very important to highlight that, results obtained by Sahin (2020) in Turkey,  
330 demonstrate a positive correlation between cases of COVID-19 and the meteorological  
331 factor speed of wind in m/s of the region.

332

### 333 3.3 Multiple correlational analysis between meteorological factors and COVID-19 cases

334

335           For multiple associations between temperature variations (minimum and  
336 maximum) and cases of COVID-19, identified daily, it is noted that with temperatures  
337 between 24 to 34°C, minimum temperatures in the 24°C range, associated with RH  
338 between 85 to 95% and temperatures around 24°C and speed between 0.5 to 2.0 m/s, the  
339 lowest average daily records of COVID-19 were observed in the municipality of Santa  
340 Barbara (Fig.4).

341

342 **Fig.4.** Multiple correlation between meteorological and demographic variables in the  
343 cases of COVID-19 in the BMR municipalities

344  
345

346           These results suggest that regions of low density hab/km<sup>2</sup> have lower records of  
347 COVID-19 cases. However, urban centers with a population density of more than 150  
348 inhabitants per square kilometer recorded the highest number of infections in the region.

349           In Castanhal and Santa Izabel, significant negative correlations were found  
350 between the number of cases and relative humidity (Table 2). Multiple spatial  
351 correlation analysis was performed considering RH as the main factor for these regions.  
352 There are associations between RH/wind speed and RH/rain, suggesting that when the  
353 RH is between 85 to 100% and the wind speed in the range of 0 to 1 m/s, in Castanhal,  
354 smaller cases were registered of COVID-19. However, for higher winds of 2 m/s and  
355 daily rainfall above 60 mm, the highest numbers of infected cases were identified.

356           Similar results, from lower occurrences of COVID-19 cases, were found in  
357 Santa Izabel when the RH varied between 85 to 100% and rainfall levels from 0 to 30  
358 mm average/day.

359           In Belém city, the combination of RH between 80 and 95% and rainfall between  
360 0 and 30 mm/day was the lowest number of cases of SARS-CoV-2 infections. For RH  
361 less than 85% and daily rainfall greater than 60 mm favored the number of cases of  
362 COVID-19. Combination of RH in the 80 to 95% range, with an average temperature  
363 index between 26 and 32 °C, the lowest numbers of SARS-CoV-2 infected individuals  
364 were registered in the municipality of Ananindeua (Fig. 4).

365           Many factors can influence the spread of viruses and respiratory infections.  
366 Correlational studies aim to subsidize intervention measures, as they have implications  
367 for the structuring of health policies and the containment of disease progress and the

368 registration of new cases. Research has suggested that there is a relationship between  
369 environmental issues and COVID-19 cases.

370 In this work, the results indicate that the population and demographic density  
371 ( $\text{hab}/\text{km}^2$ ) of a region are of great importance in the daily record of cases of COVID-19  
372 infection and the distribution of cases, according to the age group, has not shown  
373 disparity between men and women.

374 Environmental factors such as RH%, average temperature °C, minimum  
375 temperature °C, maximum temperature °C, wind speed m / s and daily rainfall mm / day  
376 have a negative relationship with cases of COVID-19 in cities with humid equatorial  
377 climate in northern Brazil. In this region, a low wind speed and high RH are observed  
378 annually.

379 These environmental factors, when associated, reduce the virus transmission  
380 process because, they hinder the movement of the virus in the environment, which  
381 suggests that transmission in the region occurs directly through fluids between man  
382 /man and objects/man. Therefore, strategic public policies focused on controlling the  
383 pandemic must consider the environmental factors of the regions involved.

384 Studies show that room temperature and its correlation with RH are important  
385 factors in the transmission of the SARS-CoV-2 virus, as well as in mortality from  
386 COVID-19 (Zhu et al., 2020; Ma et al., 2020). Therefore, it would be important to  
387 correlate these environmental factors in regions that have a low RH, high wind speed,  
388 high temperatures and low demographic density, to understand the behavior of these  
389 environmental factors in isolated transmission, when the population factor is not being  
390 relatively a factor critical.



391 Finally, attention is drawn to regions such as Peru (3rd), Ecuador (7th), Bolivia  
392 (12th), Honduras (13th) and Haiti (17th) on the rise in the ranking of COVID-19 cases  
393 in the Americas, as they are regions tropical climates very similar to the region of the  
394 present study. Especially for Haiti in Central America, as the region has a considerable  
395 demographic density of 361.5 inhabitants/km<sup>2</sup>, low Human Development Index (HDI =  
396 0.404), life expectancy of 60 years. And Honduras, as it has a low RH and low  
397 temperature and moderate wind speed, these regions present meteorological  
398 combinations favorable to the spread of SARS-CoV-2, as identified in the results  
399 presented.

400 In South America, Ecuador has presented an increasing number of cases of  
401 COVID-19. This fact is worrying because it is a country with low temperatures, low  
402 Relative Humidity and mild wind speeds. These associated factors may favor the spread  
403 of SARS-Cov-2 in Ecuador.

404

405

406

#### 407 **4. Conclusion**

408

409 The cases of COVID-19 in the RMB, have not shown disparities in relation to  
410 the gender/sex and age group of those infected. In terms of the relationship between  
411 environmental factors and the dynamics of daily cases, there is a low correlation  
412 between the factors RH%, average temperature °C, minimum temperature °C, maximum  
413 temperature °C, wind speed m/s and precipitation (rain) mm/day in number of COVID-  
414 19 cases.

415           However, the minimum temperature variable °C in the Santa Barbara region,  
416 showed a significant negative correlation at 5% with COVID-19 case records, which  
417 suggests a reduction in SARS-CoV-2 infections with increasing temperature. And  
418 therefore, in warmer periods in the region, it is expected that temperature is not a risk  
419 factor for infections.

420           Relative Humidity in the regions of Ananindeua and Castanhal showed a  
421 negative and relevant correlation with the cases of COVID-19, which suggests that RH  
422 is not a risk factor in the region, the spread of SARS-CoV-2, since the Relative  
423 Humidity recorded is always high.

424           It is noteworthy that in the northern region of Brazil the seasons of higher  
425 temperatures correspond to the period from June to December. As demonstrated in this  
426 study, high temperatures, despite the low negative correlation, were not statistically  
427 significant indicating that they reduce contamination and the registration of new daily  
428 cases. Likewise, there is no evidence to affirm that high temperatures are risk factors for  
429 the increase in cases of Covid-19. However, the significant negative correlation between  
430 number of cases and minimum temperature leads us to infer that high temperatures in  
431 the northern region will not favor the progress of SARS-CoV-2.

432           The multiple correlation of variables shows that high relative humidity  
433 associated with the phenomenon of precipitation, low wind speed and temperature  
434 above 26 ° C favors a lower incidence of new cases of COVID-19 in the study region.  
435 However, low relative humidity provides an increase in the number of cases and may be  
436 related to the drier environment. For, as the RH lowers, the environment becomes dry  
437 and facilitates the air transport of particles in the environment, enabling the transmission  
438 of the SARS-CoV-2 virus.

439 In the northern region, a low wind speed and high RH are observed annually.  
440 These associated environmental factors slow down the virus transmission process.  
441 Because, they hinder their movement in the environment, which suggests that the  
442 transmission of the virus in BMR occurs directly through fluids between man/man and  
443 objects/man.

444 Countries such as Haiti and Honduras in Central America, and Ecuador in South  
445 America are regions that must create and strengthen containment and public health  
446 policies aimed at combating pandemics and treating infected people, as they are regions  
447 that have favorable meteorological combinations for the spread of SARS -CoV-2, as  
448 identified in our results.

449

#### 450 **Conflicts of Interest Statement**

451 The authors declare that there are no conflicts of interest.

452

#### 453 **Acknowledgments**

454

455 This study was prepared with support from the Research Group on Biosystems  
456 Management, Modeling and Experimentation - GEMABio. We thank Professor PhD.  
457 Mário Miguel Amin Garcia Herreros, for his commitment and dedication to education,  
458 contributions to GEMABio research, the attention made available to students, colleagues  
459 and friends, and for his valuable and eternal friendship.

460

#### 461 **References**

462

- 463 Bashir, M. F., Ma, B., BilaL., Komal, B., Bashir, M. A., Tan, D., Bashir, M.,  
464 Correlation between climate indicators and COVID-19 pandemic in New York, USA.  
465 2020. Science of the Total Environment. v.728. 138835. DOI:  
466 <https://doi.org/10.1016/j.scitotenv.2020.138835>.  
467  
468 Bhattacharjee S., Statistical investigation of relationship between spread of coronavirus  
469 disease (COVID-19) and environmental factors based on study of four mostly affected  
470 places of China and five mostly affected places of Italy. 2020. arXiv preprint  
471 arXiv:2003.11277.  
472  
473 Bi, P., Wang, J., Hiller, J.E., 2007. Weather: driving force behind the transmission of  
474 severe acute respiratory syndrome in China? Intern. Med. J. 37 (8), 550–554.  
475 <https://doi.org/10.1111/j.1445-5994.2007.01358.x>.  
476  
477 BIGS. Brazilian Institute of Geography and Statistics. Populations. Available at:  
478 <https://cidades.ibge.gov.br/brasil/pa/panorama>. Date accessed: 10 May. 2020.  
479  
480 Brazil. Ministry of Health. Accumulated COVID-19 cases and deaths by confirmation  
481 date. Available at: <https://coronavirus.saude.gov.br/sobre-a-doenca#o-que-e-covid>.  
482 Access date: May 9 2020.  
483  
484 Bukhari, Q., Jameel, Y., 2020. Will Coronavirus Pandemic Diminish by Summer? 2020,  
485 SSRN Electronic Journal. DOI: <http://dx.doi.org/10.2139/ssrn.3556998>.  
486  
487 Chan, J.F.-W., Yuan, S., Kok, K.-H., To, K.K.-W., Chu, H., Yang, J., ... Yuen, K.-Y.,  
2020. A familial cluster of pneumonia associated with the 2019 novel coronavirus

488 indicating person-to-person transmission: a study of a family cluster. *Lancet* 395  
489 (10223), 514–523. DOI: [https://doi.org/10.1016/S0140-6736\(20\)30154-9](https://doi.org/10.1016/S0140-6736(20)30154-9).  
490  
491 Chatziprodromidou, T. A., and Vantarakis A. COVID-19 and Environmental factors. A  
492 PRISMA-compliant systematic review. medRxiv preprint DOI:  
493 <https://doi.org/10.1101/2020.05.10.20069732>.  
494  
495 Chatziprodromidou, T. A., and Vantarakis A. COVID-19 and Environmental factors. A  
496 PRISMA-compliant systematic review. 2020. medRxiv preprint DOI:  
497 <https://doi.org/10.1101/2020.05.10.20069732>.  
498  
499 Coccia, M. Factors determining the diffusion of COVID-19 and suggested strategy to  
500 prevent future accelerated viral infectivity similar to COVID. 2020, *Science of the Total*  
501 *Environment*, 729. DOI: <https://doi.org/10.1016/j.scitotenv.2020.138474>.  
502  
503 Hotez PJ, Bottazzi ME, Singh SK, Brindley PJ, Kamhawi S (2020) Will COVID-19  
504 become the next neglected tropical disease? *PLoS Negl Trop Dis* 14(4): e0008271.  
505 <https://doi.org/10.1371/journal.pntd.0008271>  
506  
507 HSSP. Health Secretariat of the State of Pará. Coronavirus in Pará. Available at:  
508 [https://portalarquivos.saude.gov.br/images/pdf/2020/May/09/2020-05-06-BEE15-](https://portalarquivos.saude.gov.br/images/pdf/2020/May/09/2020-05-06-BEE15-Boletim-do-COE.pdf)  
509 [Boletim-do-COE.pdf](https://portalarquivos.saude.gov.br/images/pdf/2020/May/09/2020-05-06-BEE15-Boletim-do-COE.pdf). Access date: 10 May. 2020.  
510

511 Hulley S. B.; Cummings, S. R.; Browner, W. S.; Grady, D.; Hearst, N.; Newman, T. B.  
512 Delineando a pesquisa clínica: uma abordagem epidemiológica. 2a Ed. Porto Alegre:  
513 Editora Artmed; 2003.  
514  
515 Jahangiri, M., Jahangiri, Milad., Najafgholipour, M. The sensitivity and specificity  
516 analyses of ambient temperature and population size on the transmission rate of the  
517 novel coronavirus (COVID-19) in different provinces of Iran. 2020. Science of The  
518 Total. Environment. v.728, DOI. <https://doi.org/10.1016/j.scitotenv.2020.138872>.  
519  
520 Lal, P.; Kumar, A.; Kumar, S.; Kumari, S.; Saikia, P.; Dayanandan, A.; Adhikari, D.;  
521 Khan, M. L. The dark cloud with a silver lining: Assessing the impact of the SARS  
522 COVID-19 pandemic on the global environment. 2020, Science of the Environment,  
523 732. DOI: <https://doi.org/10.1016/j.scitotenv.2020.139297>.  
524  
525 Lemaitre, J., Pasetto, D., Perez-Saez, J., et al., 2019. Rainfall as a driver of epidemic  
526 cholera: comparative model assessments of the effect of intra-seasonal precipitation  
527 events. Acta Trop. 190, 235–243. DOI:  
528 <https://doi.org/10.1016/j.actatropica.2018.11.013>.  
529  
530 Liu, j.; Zhou, J.; Yao, J.; Zhang, X.; Li, L.; Xu, X.; He, X.; Wang, B.; Fu, S.; Niu, T.;  
531 Yan, J.; Shi, Y.; Ren, X.; Niu, J.; Zhu, W.; Li, S.; Luo, B.; Zhang, k. Impact of  
532 meteorological factors on the COVID-19 transmission: A multicity study in China.  
533 2020, Science of the Total Environment, 726. DOI:  
534 <https://doi.org/10.1016/j.scitotenv.2020.138513>.  
535

536 Ma, Y., Zhao, Y., Liu, J., He, X., Wang, B., Fu, S., et al., 2020. Effects of temperature  
537 variation and humidity on the death of COVID-19 in Wuhan, China. *Sci. Total Environ.*  
538 724, 138226. DOI: <https://doi.org/10.1016/j.scitotenv.2020.138226>.

539

540 Menebo M. M. Temperature and precipitation associate with Covid-19 new daily cases:  
541 A correlation study between weather and Covid-19 pandemic in Oslo, Norway. 2020.  
542 *Science of the Total Environment*. v.737. 139659.

543 <https://doi.org/10.1016/j.scitotenv.2020.139659>

544

545 MORAES, B. C.; COSTA, J. M. N.; COSTA, A. C. L.; COSTA, M. H. Spatial and  
546 temporal variation of precipitation in the state of Pará. *Acta Amazon*, v. 35, p. 207-217,  
547 2005.

548 Nikpouraghdam et al. Epidemiological characteristics of coronavirus disease (COVID-  
549 19) patients in IRAN: A single center study. 2020. *Journal of Clinical Virology*. 2019.

550 DOI. <https://doi.org/10.1016/j.jcv.2020.104378>.

551

552 NMETI. National Meteorological Institute. Climatic data. Available and:

553 <http://www.inmet.gov.br/sim/sonabra/dspDadosCodigo.php?ODIxOTE=>. Access date:

554 May 07 2020.

555

556 Oliveiros, B., Caramelo, L., Ferreira, N.C., et al., 2020. Role of Temperature and  
557 humidity in the modulation of the doubling time of COVID-19 Cases. 2020, MedRxiv.

558 DOI: <https://doi.org/10.1101/2020.03.05.20031872>.

559

560 ONU. World health statistics 2019: monitoring health for the SDGs, sustainable  
561 development goals. Geneva: World Health Organization; 2019. Licence: CC BY-NC-  
562 SA 3.0 IGO.

563

564 PAHO. Pan American Health Organization. Information sheet-COVID-19. Available in:  
565 [https://www.paho.org/bra/index.php?option=com\\_content&view=article&id=6101:covi](https://www.paho.org/bra/index.php?option=com_content&view=article&id=6101:covid19&Itemid=875#datas-notificacoes)  
566 [d19&Itemid=875#datas-notificacoes](https://www.paho.org/bra/index.php?option=com_content&view=article&id=6101:covid19&Itemid=875#datas-notificacoes). access date: May 25 2020.

567

568 Prata, D. N., Rodrigues W., Bermejo, P. H. Temperature significantly changes COVID-  
569 19 transmission in (sub) tropical cities of Brazil. 2020. Science of the Total  
570 Environment. v.729. 138862. DOI. <https://doi.org/10.1016/j.scitotenv.2020.138862>.

571 Şahin, M. Impact of weather on COVID-19 pandemic in Turkey. Science of the Total  
572 Environment. 2020. v.720. DOI. <https://doi.org/10.1016/j.scitotenv.2020.138810>.

573 Shi P., Dong Y., Yan H., Zhao C., Li X., Liu W., He M., Tang S., Xi S. 2020a. Impact  
574 of temperature on the dynamics of the COVID-19 outbreak in China. Science of the  
575 Total Environment. v.728, 138890. DOI:  
576 <https://doi.org/10.1016/j.scitotenv.2020.138890>.

577

578 Shi, P., Dong, Y., Yan, H., Li, X., Zhao, C., Liu,W., He, M., Tang, S., Xi, S., 2020b.  
579 The Impact of Temperature and Absolute Humidity on the Coronavirus Disease 2019  
580 (COVID-19) Outbreak - Evidence from China. medRxiv. DOI:  
581 <https://doi.org/10.1101/2020.03.22.20038919>.

582



583 Souza Filho, J. D. C.; Ribeiro, A.; Costa, M. H.; Cohen, J. C. P. 2005. Mechanisms to  
584 control the seasonal variation of transpiration in a tropical forest in northeastern  
585 Amazonia. *Acta Amazônica* 35: 223-229.

586

587 Tamerius, J.D., Shaman, J., Alonso, W.J., et al., 2013. Environmental predictors of  
588 seasonal influenza epidemics across temperate and tropical climates. *PLoS Pathog.* 9,  
589 e1003194. DOI: <https://doi.org/10.1371/journal.ppat.1003194>.

590

591 Tan, J.; Mu, L.; Huang, J.; et al., 2005. An initial investigation of the association  
592 between the SARS outbreak and weather:with the view of the environmental  
593 temperature and its variation. *J. Epidemiol. Community Health* 59, 186–192. DOI:  
594 <https://doi.org/10.1136/jech.2004.020180>.

595

596 Tosepu, R., Gunawan, J., Effendy, D.S., Lestari, H., Bahar, H., Asfian, P., 2020.  
597 Correlation between weather and Covid-19 pandemic in Jakarta, Indonesia. *Sci. Total*  
598 *Environ.* 725, 138436. DOI: <https://doi.org/10.1016/j.scitotenv.2020.138436>.

599

600 Van Doremalen, N.; Bushmaker, T.; Morris, D. H.; Holbrook, M. G.; Gamble, A.;  
601 Williamson, B. N.; Tamin, A.; Harcourt, J. L.; Thornburg, N. J.; Gerber, S. I.; Lloyd-  
602 Smith, J. O.; de Wit, E.; Munster, V. J. Aerosol and surface stability of SARS-CoV-2 as  
603 compared with SARS-CoV-1. 2020, *N. Engl. J. Med.* DOI:  
604 <https://doi.org/10.1056.NJEMc2004979>.

605

606 Wang, L., Li, J., Guo, S., Xie, N., Yao, L., Cao, Y., et al., 2020. Real-time estimation  
607 and prediction of mortality caused by COVID-19 with patient information based in

608 algorithm. *Sci. Total Environ.* 138394. DOI:

609 <https://doi.org/10.1016/j.scitotenv.2020.138394>.

610

611 World Health Organization. Coronavirus disease (COVID-19) outbreak situation.

612 <https://www.who.int/emergencies/diseases/novel-coronavirus-2019>, Accessed date:15

613 April 2020.

614

615 Xie, J., Zhu, Y. Association between ambient temperature and covid-19 infection in 122

616 cities from China. 2020. *Sci. Total Environ*, 138201. DOI:

617 <https://doi.org/10.1016/j.scitotenv.2020.138201>.

618

619 Zhou, P., Yang, X., Wang, X. et al. A pneumonia outbreak associated with a new

620 coronavirus of probable bat origin. 2020. *Nature*. v.579, p.270–273. DOI:

621 <http://doi.org/10.1038/s41586-020-2012-7>.

622

623 Zhu, N., Zhang, D., Wang, W., et al., 2020. A novel coronavirus from patients with

624 pneumonia in China, 2019. *N. Engl. J. Med.* DOI:

625 <https://doi.org/10.1056/NEJMoa2001017>.

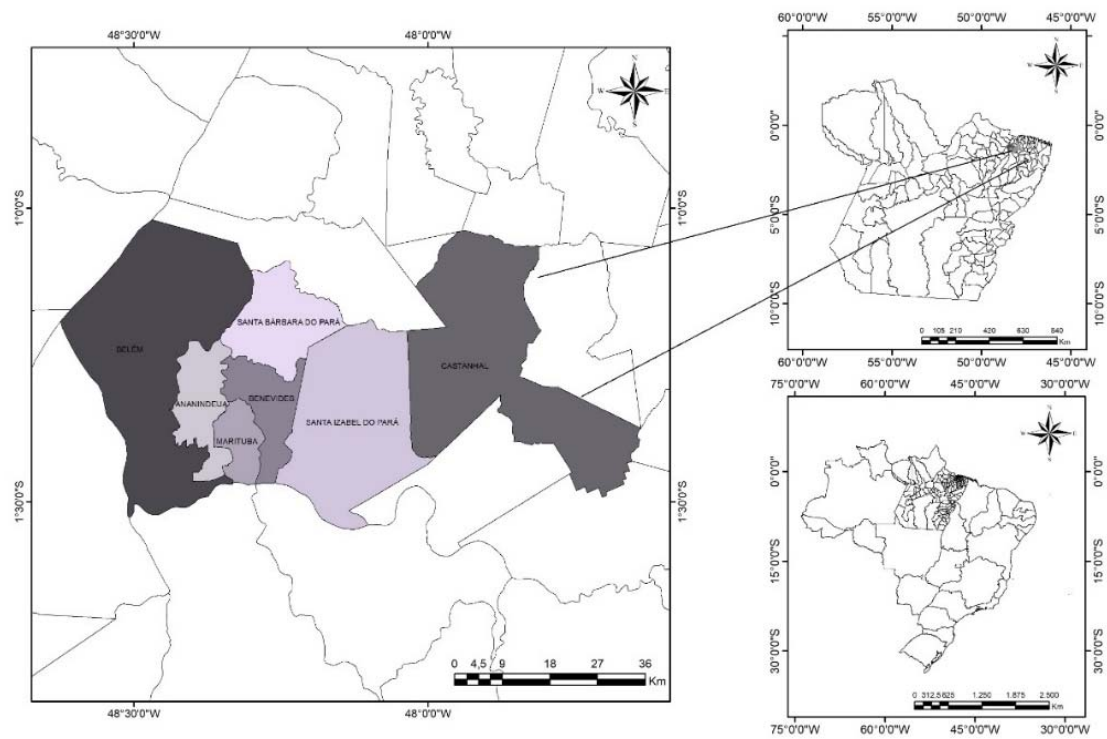

Fig.1. Composition of the Belém Metropolitan Region BMR

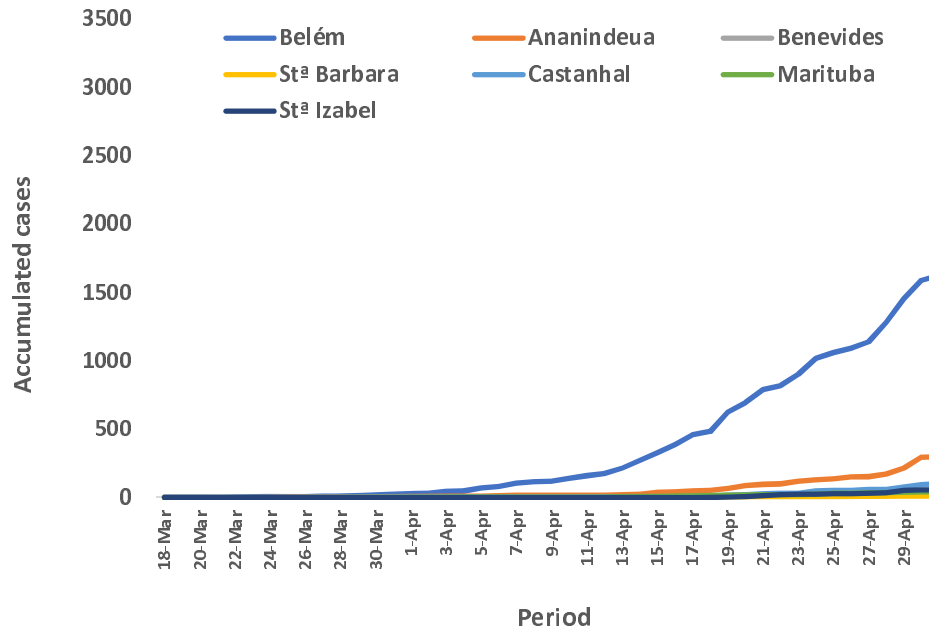

**Fig.2.** COVID-19 case records accumulated in BMR municipalities

A

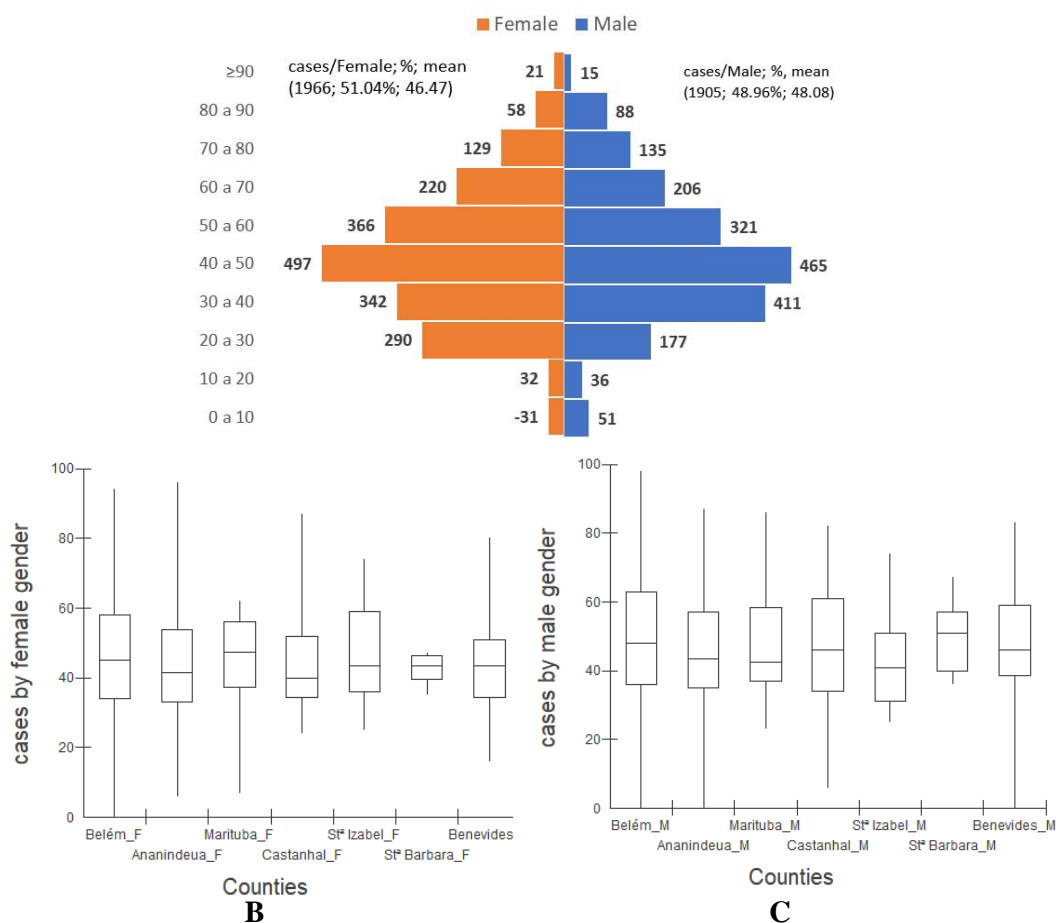

**Fig.3.** A) Behavior of the distribution of the total cases of COVID-19 according to age group and B, C) distribution by gender of the infected diagnosed in BMR municipalities.

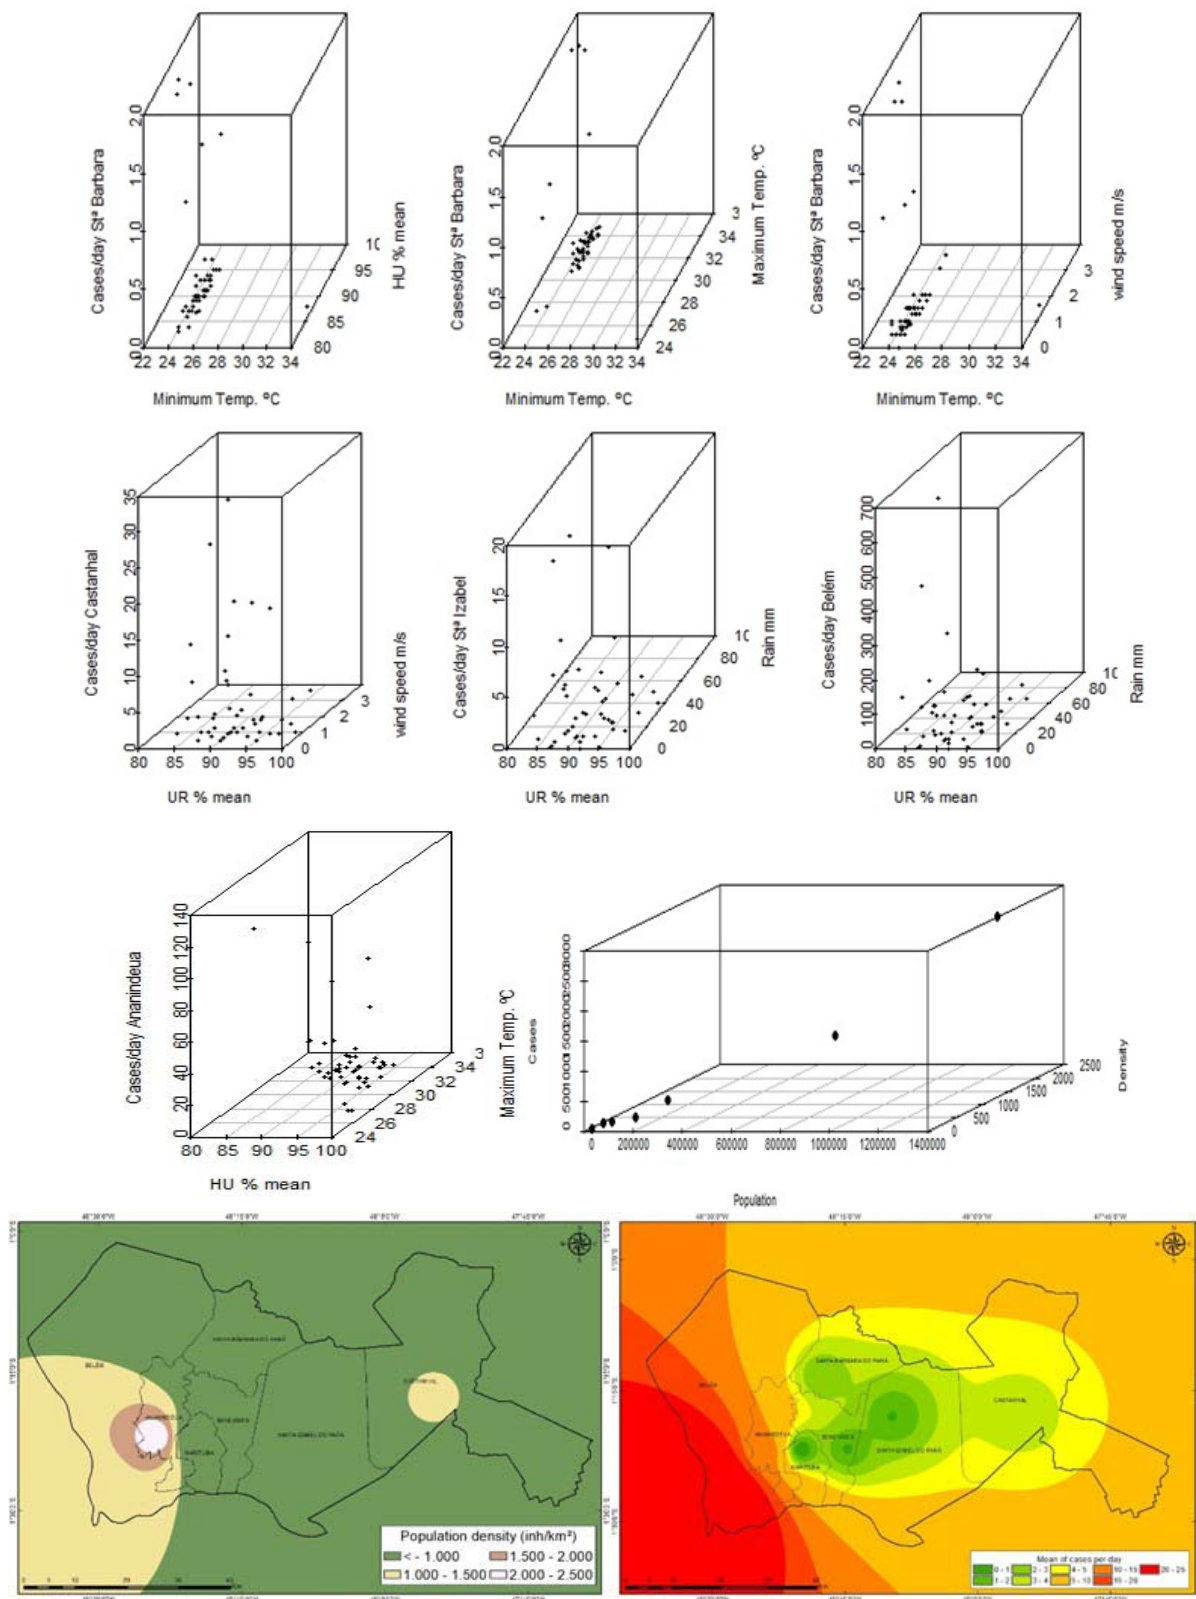

**Fig.4.** Multiple correlation between meteorological and demographic variables in the cases of COVID-19 in the BMR municipalities

**Table 1.** Relational behavior of demographics and new cases of COVID-19 recorded in the BMR.

| Municipalities       | population     |               | density hab/km <sup>2</sup> |          | cases          | %              | rho (pop./cases)      |         |
|----------------------|----------------|---------------|-----------------------------|----------|----------------|----------------|-----------------------|---------|
|                      | Male           | Female        | chi square test             | p value  |                |                | Male                  | Female  |
| Belém                |                |               |                             |          | 2996           | 76.9           |                       |         |
| Ananindeua           |                |               |                             |          | 517            | 14.1           |                       |         |
| Castanhal            |                |               |                             |          | 156            | 4.2            | (pop./cases) = 0,987  |         |
| Santa Izabel         |                |               |                             |          | 101            | 2.5            | (dens./cases) = 0.393 |         |
| Marituba             |                |               |                             |          | 46             | 1.1            |                       |         |
| Benevides            |                |               |                             |          | 44             | 1.0            |                       |         |
| Santa Barbara        |                |               |                             |          | 9              | 0.2            |                       |         |
| <b>Total cases</b>   | <b>2275032</b> |               |                             |          | <b>3969</b>    |                |                       |         |
|                      | Cases/Gender   |               |                             |          | Mean Age/CV%   |                |                       |         |
| Municipalities       | Male           | Female        | chi square test             | p value  | Male           | Female         | t test                | p value |
| <b>Belém</b>         | (1463; 48.8%)  | (1533; 51.2%) | 0.08                        | 0.778 ns | 48.70 (37.8%)  | 47.32 (37.9%)  | 1.442                 | 0.152   |
| <b>Ananindeua</b>    | (233; 45.1%)   | (284; 54.9%)  | 5.89                        | 0.015*   | 44.50 (36.8%)  | 43.49 (35.59%) | 1.029                 | 0.271   |
| <b>Castanhal</b>     | (95; 60.9%)    | (61; 39.1%)   | 9.91                        | 0.002*   | 48.61 (34.42%) | 45.03 (34.32%) | 0.384                 | 0.703   |
| <b>Santa Izabel</b>  | (50; 49.5%)    | (52; 51.5%)   | 0.09                        | 0.768 ns | 46.48 (29.4%)  | 42.37 (32.2%)  | -0.532                | 0.598   |
| <b>Marituba</b>      | (31; 67.4%)    | (16; 34.8%)   | 4.79                        | 0.028*   | 47.45 (36.04%) | 44.87 (33.7%)  | -1.719                | 0.088   |
| <b>Benevides</b>     | (28; 63.6%)    | (16; 36.4%)   | 3.27                        | 0.070 ns | 49.14 (33.9%)  | 44.31 (36.1%)  | -1.831                | 0.117   |
| <b>Santa Barbara</b> | (5; 55.6%)     | (4, 44.4%)    | 0.049                       | 0.826 ns | 50.20 (25.1%)  | 42.25 (13.0%)  | -1.45                 | 0.150   |

**Note:** in the analyzes (Chi-square and mean test) 78 cases were disregarded due to the lack of identification in the records for gender/sex and age of the infected person.
